# Supplementary material for: The control of surface texture for planar CH3NH3PbI3−xClx film and its effect on photovoltaic performance
Source: Springer Nature journal article supplement (doi:10.1007/s10854-016-4981-8), 2016-05-17
Supplement: MOESM1 [file 10130320]

**Supporting Information**

**The control of surface texture for planar CH3NH3PbI3-xClx film and its effect on photovoltaic performance**

Wenzhen Wanga, Haitao Xua, Wenqiang Xua, Yanglin Wua, Runan Caob, Jiabin Zhub, Zebo Fanga, Feng Hongb, Run Xua*, Fei Xub*, Linjun Wanga*, Jian Huanga, Yicheng Luc

a School of Materials Science and Engineering, Shanghai University, 99 Shangda Road, Shanghai, China

b Department of Physics, Instrumental Analysis & Research Center, Shanghai University, 99 Shangda Road, Shanghai, China

c Department of Electrical and computer Engineering, Rutgers University, Piscataway, New Jersey, 08854-8058, USA

* Corresponding Authors; Email: runxu@staff.shu.edu.cn; feixu@staff.shu.edu.cn; ljwang@shu.edu.cn

**
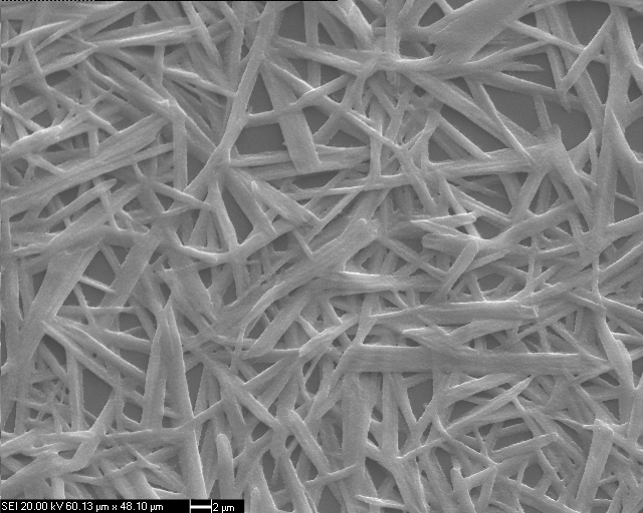
**

Figure S1. Surface SEM images of MAPbI3 films prepared from

a Solution of MAI+PbI2.


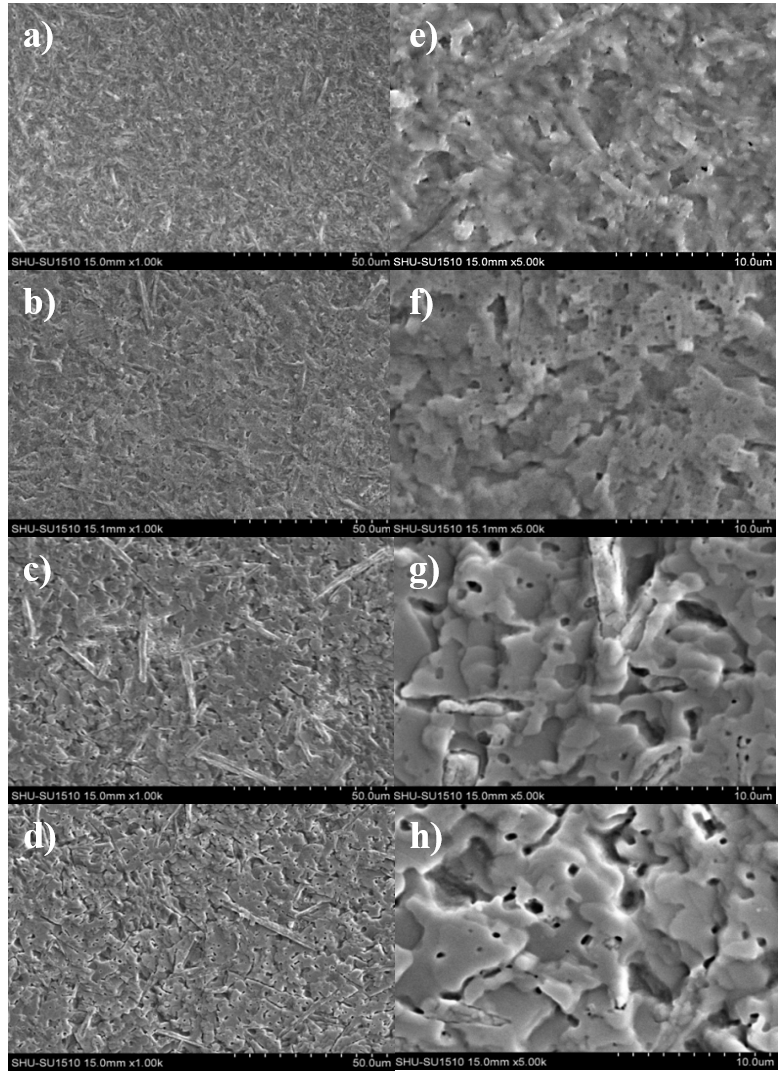


Figure S2. SEM images of perovskite CH3NH3PbI3-xClx films annealed at various temperatures: annealed directly at (a, e) 100 °C for 90 minutes, (b, f) 110 °C for 55 minutes, ( c, g) 113 °C for 40 minutes and ( d, h) 116 °C for 30 minutes.


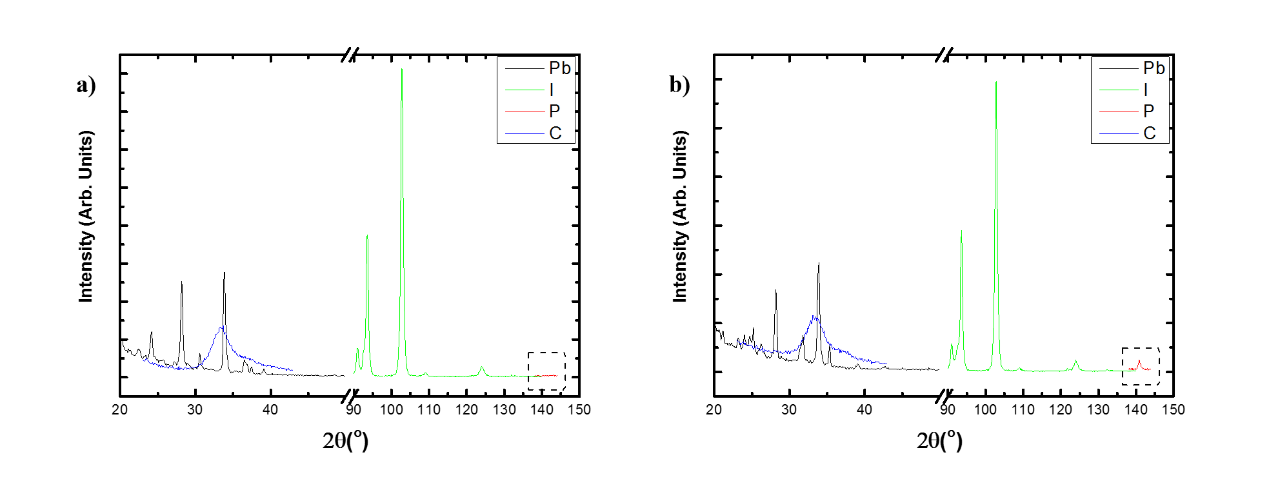


Figure S3. X-ray fluorescence patterns of MAPbI3-xClx films prepared by

(a) Precursor A and (b) Precursor B. Both films were prepared at a spin-coating

speed of 2,000 rpm.


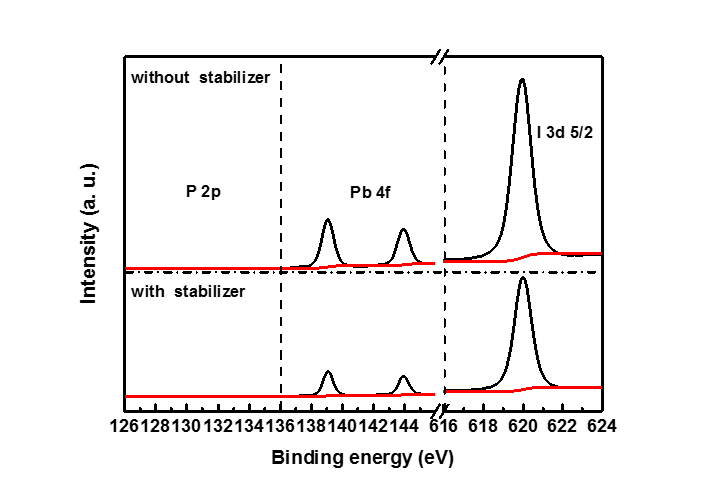


Figure S4. High resolution XPS core level spectra of P 2p, Pb 4f and I 3d5/2 of the perovskite films prepared (a) with and (b) without H3PO2 stabilizer.


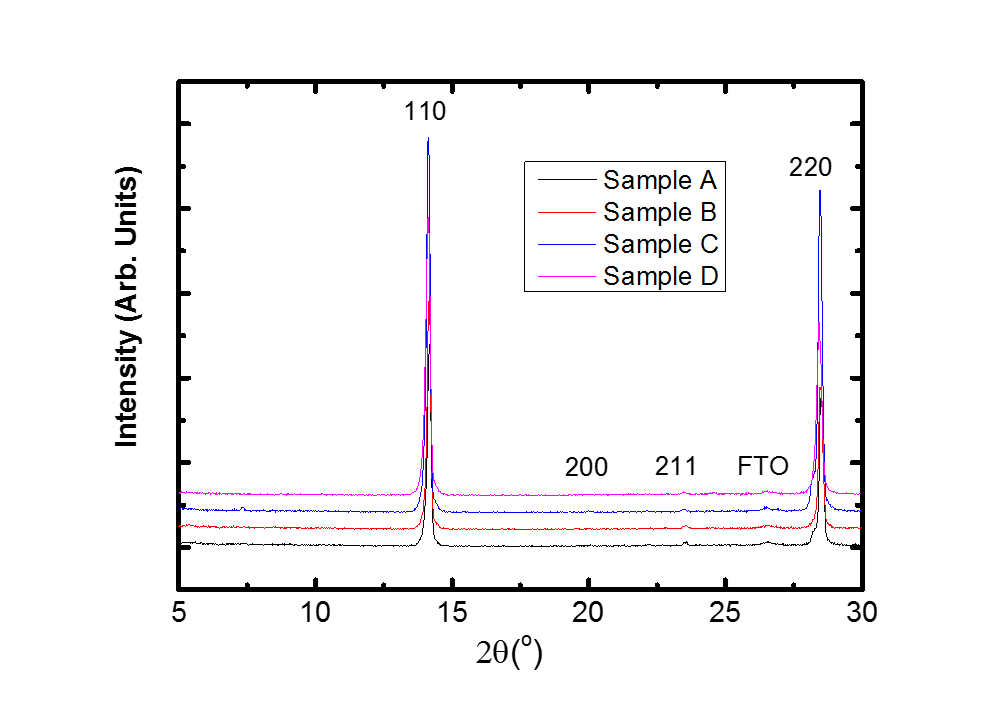


Figure S5. X-ray diffraction patterns of MAPbI3-xClx films.


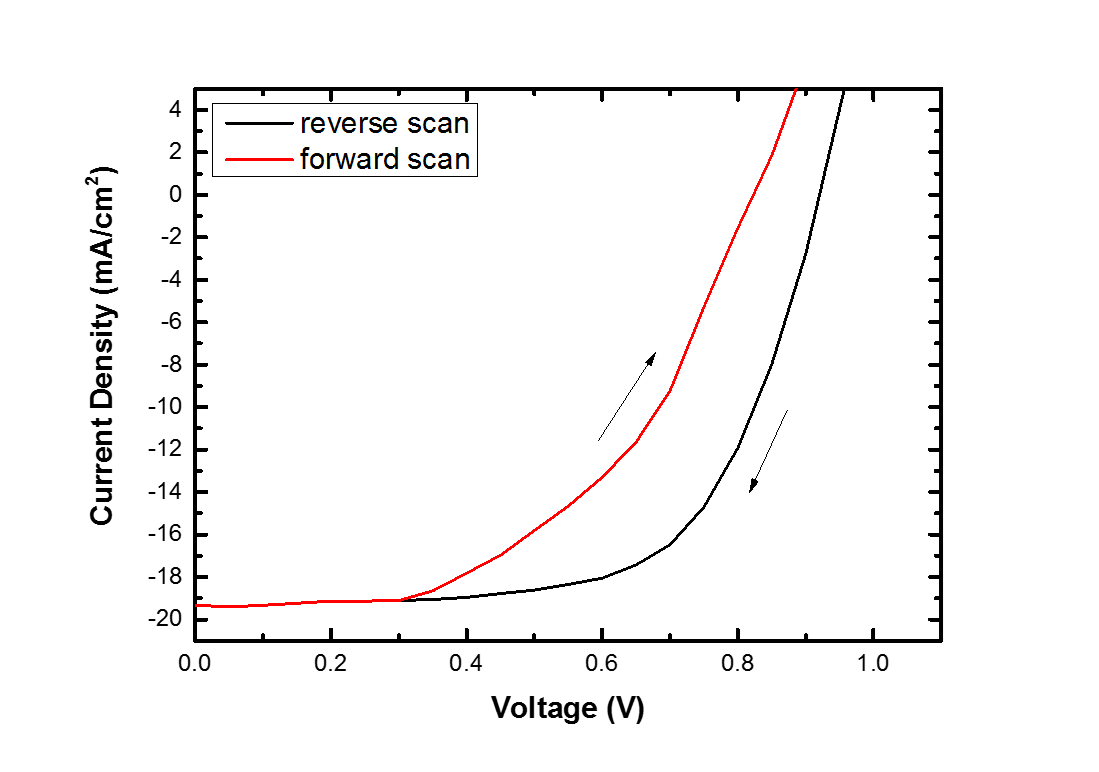


Figure S6. Typical Hysteresis of a J-V curve. All J–V scans were performed at a scan rate of 0.333 V/s under simulated AM 1.5 sunlight of 100 mW/cm2 irradiance.
